# Supplementary material
Source: PubMed Central journal article supplement (PMC7521002)
Supplement: Supplementary_Table.pdf [file Supplementary_Table.pdf]

**Supplementary Table. PBSS use from January to March 2019 and 2020 of COVID-19 exposure and non-exposure groups**

| Type            | Social distancing implementation | Group by year       |                     | $t$<br>( $p^a$ ) |
|-----------------|----------------------------------|---------------------|---------------------|------------------|
|                 |                                  | 2019                | 2020                |                  |
| Overall PBSS    | Pre                              | 18934( $\pm$ 7041)  | 30868( $\pm$ 13809) | 2.13(0.04)       |
|                 | Post                             | 30696( $\pm$ 9367)  | 77996( $\pm$ 8619)  | 6.52(<0.001)     |
| Commuters       | Pre                              | 6128.2( $\pm$ 2928) | 9744( $\pm$ 4958)   | 5.64(<0.001)     |
|                 | Post                             | 10054( $\pm$ 4977)  | 23124( $\pm$ 6026)  | 4.86(<0.001)     |
| Weekend users   | Pre                              | 17015( $\pm$ 8337)  | 28900( $\pm$ 15108) | 3.29(<0.01)      |
|                 | Post                             | 21747( $\pm$ 7084)  | 79520( $\pm$ 2896)  | 14.75(<0.001)    |
| New subscribers | Pre                              | 763( $\pm$ 587)     | 1091( $\pm$ 1101)   | 2.36(0.02)       |
|                 | Post                             | 1509( $\pm$ 596)    | 5483( $\pm$ 1874)   | 5.87(<0.001)     |

2019=non-exposure group; 2020=exposure group

Pre-social distancing = Form January 1st~ March 21th.; Post-social distancing=March 22th~ March 31th
